# Supplementary material for: Effect of TiO2 Nanoparticle on Bioaccumulation of ndl-PCBs in Mediterranean Mussels (Mitilus galloprovincialis)
Source: MDPI journal article supplement (doi:10.3390/ani13071208), 2023-03-30
Supplement: s1 [file s1]

**Table S1.** Instrumental mass spectrometry settings for target compounds.

| PCB congeners                          | Quantitative SRM       |                        |                       | Confirmation SRM       |                        |                       |
|----------------------------------------|------------------------|------------------------|-----------------------|------------------------|------------------------|-----------------------|
|                                        | Precursor ion<br>(m/z) | Product ion 1<br>(m/z) | Collision energy (eV) | Precursor ion<br>(m/z) | Product ion 1<br>(m/z) | Collision energy (eV) |
| PCB-28                                 | 256                    | 186                    | 16                    | 258                    | 186                    | 24                    |
| <sup>13</sup> C <sub>12</sub> -PCB-28  | 258                    | 198                    | 23                    |                        |                        |                       |
| PCB-52                                 | 290                    | 220                    | 28                    | 292                    | 220                    | 20                    |
| <sup>13</sup> C <sub>12</sub> -PCB-52  | 302                    | 232                    | 26                    |                        |                        |                       |
| PCB-101                                | 324                    | 254                    | 26                    | 326                    | 256                    | 18                    |
| <sup>13</sup> C <sub>12</sub> -PCB-101 | 336                    | 266                    | 24                    |                        |                        |                       |
| PCB-138                                | 358                    | 288                    | 20                    | 360                    | 290                    | 24                    |
| <sup>13</sup> C <sub>12</sub> -PCB-138 | 372                    | 302                    | 24                    |                        |                        |                       |
| PCB-153                                | 362                    | 290                    | 20                    | 360                    | 290                    | 24                    |
| <sup>13</sup> C <sub>12</sub> -PCB-153 | 372                    | 302                    |                       |                        |                        |                       |
| PCB-180                                | 392                    | 322                    | 26                    | 394                    | 324                    | 22                    |
| <sup>13</sup> C <sub>12</sub> -PCB-180 | 406                    | 336                    | 25                    |                        |                        |                       |

### S-1 GC-MSMS method validation

Analytical methods were fully validated in agreement with the guidelines laid down by SANTE/11312/2021 (Guidance document on analytical quality control and method validation procedures for pesticide residues and analysis in food and feed), following the conventional validation approach required for quantitative confirmation. The following parameters were evaluated: specificity, linearity, recovery, repeatability, and LOQ.

Specificity was assessed and verified in the blank matrix verifying the absence of signal higher than 30% of the LOQ level.

Linearity was studied by means of calibration curves within the range of 0,75 -100 ng/g for single congener (corresponding to 3–400 ng/g in the sample). Calibration curves were built by plotting the instrument signal versus the analyte concentration including zero level in the curve construction. Linear regression analysis was carried out and the linear calibration model was verified by correlation coefficients (Pearson's R) better than 0.992 and by Mandel test.

Recovery and repeatability were estimated by analyzing seven replicates at three concentration levels (6.26-125-250-400 µg/kg in the sample).

LOQ was estimated as the lowest spike level meeting the method criteria for recovery (80-120%) and repeatability (CV % ≤ 20%) (Table S2).

**Table S2.** GC-MSMS Method recovery, repeatability.

| Compound | Nominal concentration<br>(µg/kg) | Recovery% | Repeatability (CV %) |
|----------|----------------------------------|-----------|----------------------|
| PCB-28   | 6.25                             | 104.4     | 15.2                 |
|          | 125                              | 86.4      | 16.7                 |
|          | 250                              | 103.7     | 6.5                  |
|          | 400                              |           |                      |
| PCB-52   | 6.25                             | 110.1     | 13.8                 |
|          | 125                              | 83.7      | 14.0                 |
|          | 250                              | 106.9     | 6.9                  |
|          | 400                              |           |                      |
| PCB-101  | 6.25                             | 103.5     | 16.7                 |
|          | 125                              | 83.7      | 16.8                 |
|          | 250                              | 109.3     | 5.4                  |
|          | 400                              |           |                      |
| PCB-153  | 6.25                             | 96.9      | 6.9                  |
|          | 125                              | 82.5      | 17                   |
|          | 250                              | 107       | 4.9                  |
|          | 400                              |           |                      |
| PCB-138  | 6.25                             | 104.8     | 14.6                 |
|          | 125                              | 85.4      | 14.9                 |
|          | 250                              | 110.0     | 8.6                  |
|          | 400                              |           |                      |
| PCB-180  | 6.25                             | 107.9     | 9.3                  |
|          | 125                              | 90.6      | 15.1                 |
|          | 250                              | 103.3     | 4.2                  |
|          | 400                              |           |                      |
